# Supplementary material for: A Novel Rapid DNA Microarray Assay Enables Identification of 37 Mycoplasma Species and Highlights Multiple Mycoplasma Infections
Source: PLoS One. 2012 Mar 29;7(3):e33237. doi: 10.1371/journal.pone.0033237 (PMC3315567; doi:10.1371/journal.pone.0033237)
Supplement: File S4 — List of oligonucleotide probes on the array and Probe Matching Matrix (XLS) [file pone.0033237.s004.xls]

## Sheet: tuf probe matching matrix
probe	Sequence 5'-3'	G+C	Tm (°C)	Target	Spot ID	Aaxanthum	Alaidlawii	Amodicum	Madleri	Magalactiae	Malkalescens	Malvi	Marginini	Mbovigenitalium	Mbovirhinis	Mbovis	Mbovoculi	Mcalifornicum	Mcanadense	Mcanis	Mcapcapricolum	Mcapcapripneumoniae	Mconjunctivae	Mdispar	Mfermentans	Mgallinarum	Mgallisept	Mgateae	Mgenitalium	Mhominis	Mhyopneumoniae	Mhyorhinis	Mimitans	MiowaeNFUN	Mleachii	Mmeleagridis	MmycoidescapriY	Mmycoidesmycoides	Morale	Movipneumoniae	Mpneumoniae	Mpulmonis	Mputrefaciens	Msalivarium	Msynoviae	Mverecundum	Udiversum	Uparvum	Uurealyticum
043_Alaidlawii	TAAGAGGTGTTGATCGTGAAGGTGTAGAA	41	60.9	tuf	44		0	4							6					6	5	5				6	6								5		5	5								6
044_Alaidlawii	GCAGTTGATGCATACATCGATACTCCAT	43	60.7	tuf	43		0
076_Amodicum	GAATTACTTTCAGAATACGATTTCCCAGG	38	57.9	tuf	76	6	3	0
077_Amodicum	GCAGTTGATTCATACATCGACACACCAG	46	61.6	tuf	77		4	0		6			6		6		6			3			5	3		6		6		6	5	4								5						3
078_Amodicum	TACGTGGTGTATCACGTGATGATATCGAA	41	61.1	tuf	78	5		0
071_Aaxanthum	GCTGTTGACTCATATATCGATAACCCAG	43	58.7	tuf	71	0			5				5							6								5																	4	6
019_Magalactiae	GCAGTTGACACATGAATCGAAACACCTG	46	62.4	tuf	19			6	5	0				3		1	4	4							6	6										6
097_Malkalescens	GCAGTTGATAGTTATGTTGAAGAACCAG	39	58.1	tuf	97						0								5				6									6
098_Malkalescens	TACGGGGAATTGATCGTTCAGAAATCGAA	41	61.9	tuf	98						0		4						4				6					5
063_Malvi	GCTGTTGACGAAACAATTCCTGATCCTG	46	62	tuf	63							0
041_Marginini	GCTGTTGACTCATACATCGAAGAACCAA	43	60.9	tuf	41	5		6					0						4	5								0		2														6	4	5
042_Marginini	TACGTGGTATTGATAGATCAGAAATCGAA	34	57.7	tuf	42				4	6	4		0	4		6		4	0						4			1								6
068_Mbovirhinis	GCTGTAGATACATACATTGAAACTCCAG	39	57.3	tuf	68		6	6	6						0				6	3					5	6				6		6				6						5			4	3
069_Mbovirhinis	GGTCTTCTTTCAGAATATGGATTTGATGG	38	57.9	tuf	69				5					6	0			6		2					6					4												6			6	5
070_Mbovirhinis	TTCGTGGTGTAAACCGTGATGAAATTGAG	41	61.6	tuf	70										0					6																									6
001_Mbovis	GCAGTTGACACATGAATCGAAACTCCTG	46	62	tuf	1				5	1				2		0	5	5							5	5										5						5
002_Mbovis	TTCGTGGTGTTGAAAGATCAGCTATTGAA	38	60.7	tuf	2				2	0			6	2		0		2	6						5			5								6
094_Mbovigenital	GAACTTCTATCAAAATACGGTTTTGATGG	34	57	tuf	94				5	6				0	6			2		6					6					5															6	6	6	6
095_Mbovigenital	GCTGTTGACACATGAATCGAAACTCCTA	43	60.9	tuf	95				6	3				0		2		5							5
096_Mbovigenital	TACGTGGTGTTGAAAGATCAGCTATCGAA	41	61.6	tuf	96				2	2			4	0		2		2	4						5			3
079_Mbovoculi	GCAGTTGATACTTGAATCGACTCACCTG	46	61.2	tuf	79			6		4						5	0	4					5	4							4	4															6
080_Mbovoculi	TCCGTGGTATTGACCGTAAAGACATTGAA	41	61.8	tuf	80												0							4					5				6							4	5
099_Mcanadense	ATGCTGTTGATACATATATTGAAGAACCAAA	29	57.6	tuf	99						6		5						0	6								5		2									6						5
008_Mcanis	GCTGTTGATTCATACATTGAAACACCAG	39	59	tuf	8	6	6	3	5				5		3				5	0			6	6	6			5		5	6	5								6		6			4	0
009_Mcanis	GGTCTTCTTTCAGAATACGGATTTGACGG	45	61.3	tuf	9									6	2					0					6					6															4	3
010_Mcanis	TTCGTGGAGTTAACCGTGAAGATGTTGAA	41	62.1	tuf	10										6					0							6						5							5					3	1
064_Mcalifornicum	GCTGTCGATACTTGAATCGAAACACCTG	46	61.6	tuf	64				4	4				5		5	4	0
065_Mcalifornicum	TACGTGGTATTGAAAGATCAGCTATTGAA	34	58.2	tuf	65				2	2			4	2		2		0	4						5			5								6												6
082_Mcapcapripn	TACGTGGTGTTGATAGACATTCAGTAGAG	41	59.5	tuf	82																2	0													2		1	1					6	6
023_Mconjunctivae	GCAGTTGATAATTACATTGACTCACCAG	39	58.1	tuf	23			5			6						5			6			0	4		6					4	1								4		4				6
024_Mconjunctivae	TACGTGGAGTTGATCGTAGCGAAATTGAA	41	62	tuf	24						6												0						5	5
131_Mdispar	GAACTTCTTTCTTCATATGACTTCGATGG	38	57.9	tuf	131												5	6						0							3									3
132_Mdispar	GCAGTTGATTCTTATATCGACTCACCAG	43	59.1	tuf	132			3									4			6			4	0							2	3								4						6
028_Mfermentans	GCTGTTGACACATGGATTCAAACTCCAG	46	61.9	tuf	28					6				5	5	5				6					0																	6			5	6
029_Mfermentans	TTCGTGGTATTGAAAGAGCAGGAATCGAA	41	62	tuf	29				4	5			4	5		5		5	4						0			5								6			5
118_Mgallinarum	GACTTATTAAGCAAATACGGATTTGACGG	38	58.6	tuf	118						5															0						6				2								4	6		6	6	5
119_Mgallinarum	GCAGTTGACAACTACATCGAAACTCCAG	46	61.5	tuf	119		6	6		6					6	5					6	6	6			0	6								6		6	6				2			6
120_Mgallinarum	TTCGTGGTATTGAAAAAAGCCAAATTGAA	31	58.9	tuf	120																					0										4			5
014_Mgallisept	GCAGTTGATGAATACATCCCAACTCCTG	46	61.2	tuf	14		6														2	2				6	0		4				3	6	2		2	2			4		2
015_Mgallisept	TTCGTGGTGTAGACCGTAAAGATGTACAA	41	61.3	tuf	15															6				6			0		6				1							4	5
093_Mgateae	TACGTGGTGTTGATAGATCAGAAATCGAA	38	59.7	tuf	93				6	5	5		1	3		5		5	1						5			0
020_Mgenitalium	GATCTGTTAACTTCCTATGGTTTTGATGG	38	57.9	tuf	20							5									6	6							0					6							6
021_Mgenitalium	GCAGTTGATGAATGGATTCCAACTCCTA	43	60.5	tuf	21																5	5					4		0				5		5		5	5			2		3
022_Mgenitalium	TACGTGGTGTTGAACGTAAAGAAGTTGAA	38	60.8	tuf	22	6											5						5	6			6		0				5						6	5	4
003_Mhominis	AGCCTTCTATCAGAATATGGTTTTGATGG	38	58.7	tuf	3									5	4			5		6										0												6
004_Mhominis	GCTGTTGATACATACATCGAAGAACCAA	39	59.2	tuf	4			6	4				2		6				2	5								2		0									5					6	4	5
005_Mhominis	TACGTGGAATTGACAGAAGCGAAGTTGAA	41	62.3	tuf	5																		5							0				6					5				6	6
039_Mhyopneumon	GCAGTTGATTCTTATATTGACTCACCTG	39	57.7	tuf	39			5									4			6			4	2							0	3								4						6
040_Mhyopneumon	TCCGTGGAGTAGATCGAAAAGATATCGAA	41	60.7	tuf	40																			5							0									5
089_Mhyorhinis	GCAGTTGATACTTACATTGACTCACCAG	43	59.4	tuf	89			4			6				6		4			5			1	3							3	0								3		5				5	6
090_Mhyorhinis	TAAGAGGAGTTAACAGAGACGAAATCGAA	38	59.2	tuf	90																											0		4
083_Mimitans	GACCTTCTTAAATCTTACGGATTTGATGG	38	57.9	tuf	83							5															1						0
084_Mimitans	GCAGTGGATGATTACATTCCAACTCCTG	46	61.2	tuf	84																5	5					3		5				0		5		5	5				6	3
085_Mimitans	TTCGTGGTGTTGACCGTAAAGATGTACAA	41	62.1	tuf	85												6			5				5			1		5				0							3	5				6	6
107_MiowaeNFUN	CTGTAGATAGCTACATCCCAGCTCCTG	52	61	tuf	107																						6							0
108_MiowaeNFUN	TAAGAGGTATTAACAGAGACGAAGTTGAA	34	57.5	tuf	108																									6		4		0					5								5	6	6
075_Mleachii	TACGTGGTGTTGACAGACATTCAGTAGAA	41	61.3	tuf	75																0	2													0		1	1					4	6
072_Mmeleagridis	ACAGTAGATTCATGAATTGAAACTCCTG	36	57.1	tuf	72					6					6	5																				0
073_Mmeleagridis	GACTTATTAAGCAAATATGGTTTTGACGG	34	57.3	tuf	73											6										2						5				0								5			6	6	5
074_Mmeleagridis	TTCGTGGTATTGAAAAGTCACAAATTGAA	31	58.3	tuf	74				6	6			6			6		6	6						6	4										0
081_Mmyccapri	AGATCTATTAACTGAATACGACTTTGATGGA	32	57.8	tuf	81																1	1													2		0	1					0		6
016_Mmycmyc	GATCTATTAACTGAATACGACTTTGACGG	38	57.6	tuf	16																2	2	5												1		1	0					1	6	4
017_Mmycmyc	GCAGTTGATGAATACATCCCAACTCCAC	46	61.4	tuf	17		5														0	0				6	2		5				5		0		0	0					2
018_Mmycsmyc	TACGTGGTGTTGATAGACATTCAGTAGAA	38	59.2	tuf	18																1	1													1		0	0					5	5
091_Morale	GCATTATTATCAGAATATGGTTTCGACGG	38	58.3	tuf	91		5		5									6							6														0			5			6		6	6
092_Morale	TTCGTGGTATTGAAAGAGACGAAGTTGAA	38	60.4	tuf	92				6																5	5			6	5				5					0								5	5	5
140_Movipneumon	GAACTTCTTTCTTCATATGATTTTGACGG	34	57.1	tuf	140												6						6	3							2									0
141_Movipneumon	GCAGTTGACTCTTACATTGACTCCCCAG	50	62.4	tuf	141			5												6			4	4							4	3								0		5			6	6
142_Movipneumon	TTCGTGGTGTTGACCGTAAAGATATCGAA	41	61.8	tuf	142												4			5				2			4		5		5		3							0	5					6
052_Mpneumoniae	GACTTATTAACTTCTTACGGCTTTGATGG	38	58.1	tuf	52							6																	6					5			6				0		6	6					6
053_Mpneumoniae	GCAGTTGATGATGGATTCCAACTCCTG	48	61.3	tuf	53																						4		2												0		4
087_Mputrefaciens	GCAGTTGATGAATACATTCCAACTCCTC	43	59.7	tuf	87																2	2					2		3				3		2		2	2			4		0
088_Mputrefaciens	TACGTGGTGTTGACAGAAACTCAATTGAA	38	60.8	tuf	88																4	6								6					4		5	5					0
006_Mpulmonis	GCAGTTGACAATTACATTGAAACTCCAG	39	58.9	tuf	6										5	5				6			4		6	2						5	6							5		0			5	6
007_Mpulmonis	TTAGAGGTGTAGATAGAAATGACGTTGAA	34	57.5	tuf	7																																					0
066_Msalivarium	GCAGTAGACACATACATTGATGAACCTA	39	58.3	tuf	66								6															6		6														0
067_Msalivarium	TACGTGGAATTGATAGAGATCAAGTAGAA	34	57.2	tuf	67																6	6								6					6		5	5						0
011_Msynoviae	GATCTATTATCAGAATACGGATTTGACGG	38	57.3	tuf	11									6	6					4	6	6			6	6									5		5	4	6				5		0	6	6	6
012_Msynoviae	GCTGTTGACACATACATTGAAAACCCAG	43	60.6	tuf	12	4			4				5		4				5	4					5	6		5		5										6		5			0	4
013_Msynoviae	TTCGTGGAGTTAACCGTGATGACGTAGAA	45	63	tuf	13	6									6					3													6												0	4
133_Mverecundum	TCACTTCTTTCAGAATACGGATTTGACGG	41	60.8	tuf	133									6	5					3					6																	5			6	0
134_Mverecundum	TTCGTGGAATTAACCGTGAAGATGTTGAA	38	60.9	tuf	134															1													6							6					4	0		6
151_Udiversum	GCAGTTGATACTTGAATTCCATTACCAG	39	58.1	tuf	151												6															6															0	2	3
152_Uparvum	GCAGTTGATTCATGAATTCCATTACCAG	39	58.6	tuf	152																																										2	0	1
048_Uurealyticum	GCAGTTGACTCATGAATTCCATTACCAG	43	59.9	tuf	48																																										3	1	0
049_Uurealyticum	TACGTGGTATTAAAAAAGAAGACGTTGAA	31	57.5	tuf	49																													6					5								2	1	0

## Sheet: 23S probe matching matrix
probe	Sequence 5'-3'	G+C	Tm (°C)	Target	Spot ID	Aaxanthum	Alaidlawii	Amodicum	Madleri	Magalactiae	Malkalescens	Malvi	Marginini	Mbovigenitalium	Mbovirhinis	Mbovis	Mbovoculi	Mcalifornicum	Mcanadense	Mcanis	Mcapcapricolum	Mcapcapripneumoniae	Mconjunctivae	Mdispar	Mfermentans	Mgallinarum	Mgallisepticum	Mgateae	Mgenitalium	Mhominis	Mhyopneumoniae	Mhyorhinis	Mimitans	Miowae	Mleachii	Mmeleagridis	MmycoidescapriLC	Mmycoidesmycoides	Morale	Movipneumoniae	Mpneumoniae	Mpulmonis	Mputrefaciens	Msalivarium	Msynoviae	Mverecundum	Udiversum	Uparvum	Uurealyticum
acholeplasma_401	GGTCTCTGCAAAACCGTAAGGTGAAGT	48	60	23S rDNA	153	0	0	0	5	5				4	4	5				4					4	4			5							4					5				3	4
mycoplasma_292-1	GTTAAGGAACTCTGCAAAATGACCCCGTA	45	60	23S rDNA	154	2	2	2	0	0	4	2	4	0	2	0	0	4	4	2	3	3	1	2	2	0	4	4	4	4	2	4	4	3	3	1	3	3	2	2	4	2	3	4	2	2	2	2	2
mycoplasma_292-2	GCTAAGGAACTCTGCAAAATAACTCCGTA	41	60	23S rDNA	155	3	5	3	3	3	6	3	6	3	3	3	3	6	6	3	0	0	3	4	4	3	4	6	3	6	4	6	4	4	0	4	0	0	3	4	3	4	0	6	4	3	5	3	3
mycoplasma_295-3	AAGGAACTCTGCAAATTAACCCCGTA	42	57	23S rDNA	156	4	2	4	2	2	2	0	2	2	0	2	2	2	2	0	2	2	2	3	2	2	2	2	0	2	3	2	2	1	2	3	2	2	0	3	0	1	2	2	1	0	2	0	0
mycoplasma_295-4	AAGGAACTCTGCAAATTCATCCCGTAAG	43	60	23S rDNA	157	6	4	6	3	3	0	2	0	3	2	3	3	0	0	2	5	5	3	3	3	3	0	0	2	0	3	0	0	1	5	4	5	5	2	3	2	1	5	0	2	2	2	3	3
mycoplasma_292-5	GTTAAGGAACTCTGCAAATTCACCCCGTAA	43	60	23S rDNA	158	4	2	4	2	2	2	1	2	2	1	2	2	2	2	1	4	4	2	4	4	2	2	2	3	2	4	2	2	2	4	3	4	4	1	4	3	0	4	2	1	1	3	2	2
mycoplasma_292-6	GTTAAGGAACTCTGCAAAATGACCCCGTAA	34	60	23S rDNA	159	2	2	2	0	0	4	2	4	0	2	0	0	4	4	2	3	3	1	3	2	0	4	4	4	4	3	4	4	3	3	1	3	3	2	3	4	2	3	4	2	2	3	3	3
ureaplasma_204	AGCGTTAAACAATTAGTAGTCCGTACCGA	41	60	23S rDNA	160																																										3	1	0
A.axanthum_131	GACAGGTAAAAGGTGATGACTTCAAAC	41	55	23SrDNA	161	0
A.axanthum_202	CTAAGATTAATTTATTTACTACCCGTACCG	33	56	23SrDNA	162	0	5	3
A.laidlawii_131	GATATAAAGACGTACGAGTTCATGC	40	54	23SrDNA	163		0
A.laidlawii_202	CTAAGGTTAATCATTATACTGCCCGTACCG	43	60	23SrDNA	164	5	0
A.modicum_126	GTATTAATAGGTAAAGAATGATGATTTCACAC	28	55	23SrDNA	165			0
A.modicum_202	CTAGGGATAATTTATTTACTACCCGTACCG	40	58	23SrDNA	166	3		0
adleri_138	GCATAGATCGCAAGATTGAATTTGATGAT	34	59	23SrDNA	212				0
adleri_198	GCTTCTAAACTTAAGCACATGGAAACCTGT	40	60	23SrDNA	213				1	5				4		6									4	5										3
agalactiae_138	GCTTCTAAACTTAATGTTATTGAAACCTGT	30	56	23SrDNA	167					0						2
agalactiae_198	GCATAGGACAATTGTCTGAATTTGCCAAT	38	59	23SrDNA	168				5	0	6			2		2		6	6						2	4		6				6				3
alkalescens_106	GCATAATTTTAACCGGGAGTTATGATG	37	55	23SrDNA	171						0							0	3																									6
alvi_206	AGAAGGGGTGCTCAACTTAAAACTTGA	41	58	23SrDNA	172							0
alvi_330	GGTTAATTGCATGGTTGCCAGTACCG	50	59	23SrDNA	173							0															5						4
arginini_65	TGTGGGGTAAATAGTGACTGGGTTATG	44	57	23SrDNA	174						3		0	6				3	2									1		4		1												6
bovigenital_132	ACGCATAGGCTTTAGCTGAATTAGTT	38	58	23SrDNA	175									0
bovigenital_341	TCACGCAAGTGAGCCACAGAAAATTAT	41	60	23SrDNA	176									0
bovirhinis_138	GCATAGGTCTTAGGACTCAATTGTGTGAT	41	59	23SrDNA	177										0					5
bovirhinis_73	GTAAATAGTAACTGGTGAATATAGTTAAATGCGT	29	58	23SrDNA	178										0					2																									6
bovis_138	GCATAGGACTTTTGTCTGAATTTGCCAAT	38	59	23SrDNA	180					2						0
bovis_196	GTTTCTAAACTTAATTTTATTGAAACCTGTACCAAG	28	58	23SrDNA	181					3				4		0									4	3										3
bovoculi_142	CCATTTATGGGTCACAGTAAAATAGG	38	54	23SrDNA	182								4				0		5											6														5
bovoculi_341	AGTGAACAGGCAACTAAGTAACGAATTAG	38	59	23SrDNA	183												0						1			6
canis_138	GCATAGAACTTAGGTTTGAATTGTGTGAT	34	57	23SrDNA	185										5					0
canis_72	GGTAAATAACAACTGGTGAATATAGTTAAATGC	30	57	23SrDNA	186										2					0																									4	6
capri+myc_339	GCTTATCTATGATAAGCCGCAGTGAAG	44	60	23SrDNA	232																3	3													4		0	0					3
capricolum gr_57	TGCTGGATATCCCGGGCTAAGCA	57	60	23SrDNA	231																0	0													0		2	1					6
conjunctivae_202	CCATTTATGGGCCACAGTAAAATAGG	42	56	23SrDNA	187												2						0	3																2
conjunctivae_341	CTAGTGTTAATTTCTTACCAACCTGTACCGA	39	59	23SrDNA	188												1						0	6							6															6
dispar_147	CCTTTTTTTAAGGGCCTCAGTGAAATAGG	41	59	23SrDNA	189																		2	0							2									2				6
dispar_341	AGGGGAGACCCAAGTACCGAATTAAAT	44	58	23SrDNA	190																			0							3									6
fermentans_110	GGTAAGCGTTCACTGGTGACTGTA	50	57	23SrDNA	191				6	4					6	5				4					0																					5
fermentans_72	AGTCTATAACCGGGAGGCGTGAT	52	58	23SrDNA	192					5						5									0											6										6
gallinarum_105	GTGGGGTAAATTTCAACTGGGACTAGCAG	48	60	23SrDNA	195																					0
gallinarum_67	CACTAGTCAATACCGGGAGAAATGACG	48	59	23SrDNA	196																					0													6
gallisepticum_327	GCAAGAAGGGATGCTCAATGTAACAGTT	43	60	23SrDNA	197							6													6		0						2											5
genitalium_337	ACTAAAACTCAACTCTATGCCAAACCGT	39	58	23SrDNA	200																6	6							1								4	4			1
genitalium_390	GTGCTTATGTAAAGTAAGCCGCAGTG	46	59	23SrDNA	201				6	6						6											5		0				5	5							1				6		6	6	6
hyopneum_171	CCTTTTTCTTAAAGGGCCTCAGTAAAATAGG	39	59	23SrDNA	202												6						5	3							0						6	6		3
hyopneum_341	AATGACTCTCTGTTTCCAAGAAAAGTCTCT	37	59	23SrDNA	203																			3							0									6
imitans+gallis_206	GGTTAACTATTTGTTTCCAGTACCGAG	41	56	23SrDNA	198																						0						0
imitans_327	GCGAGAAGGGATGCTCAATGTAAAAGT	44	60	23SrDNA	199							4															2		3				0								3							6	6
iowae_114	AGTTTATCATTGTATCGACCGTACCGA	41	58	23SrDNA	204																													0
iowae_204	TATAATGGTGAGGCACGAATACGAGT	42	58	23SrDNA	205																													0
meleagridis_110	GCAGGGTAAGTATTAATTGGGGACTGTAG	45	59	23SrDNA	206																															0
meleagridis_67	AGGCCATAACCGAAAGATACGATGC	48	59	23SrDNA	207																															1
myc cluster_350	ATGATAAGCCGCAGTGAAGAGGGA	50	59	23SrDNA	233							6									1	1					6		5				5	5	2		0	0	6		5		2				5	5	5
myc cluster_367	GAAGAGGGAGGGGCAACTGTTTAACAA	48	59	23SrDNA	234				6	6	5	5	5	6	5	6	4	5	5	5	0	0	4	4	6	6	5	5	5	5	4	5	5	2	1	6	0	0	4		5	5	0	5	5	5	4	4	4
orale_110	GCTTCTAACTATAAATTTTATGAACCCG	32	55	23SrDNA	210																							6				6							0
orale_198	AGCGCTTAACCGGGAGATGCGAT	57	62	23SrDNA	211						4							4	5									5				5							0
ovipneumon_341	GGTAAGCAGTTAGAAAGTTATGCAGG	42	57	23SrDNA	214																			6							6									0					6
ovipneumon_72	CCTTTTTTAAAGGGCCACAGTAAAACGAG	41	59	23SrDNA	215												3							3							4									0
pneumoniae_337	ACTAAAACACAACTCTATGCCAAACCGT	39	58	23SrDNA	208																								0												0
pneumoniae_390	GTGCTTATGTAAAAGTAAGCCGCAGTG	44	60	23SrDNA	209	6	6	6	5	5	6	6	6	6	6	5		6	6	6					6	6	4	6	1	6		6	4	4		6					0				5	6	5	5	5
pulmonis_341	CATTCTTTGAATGGCAACATTAAATTGTGA	30	57	23SrDNA	216																																					0
pulmonis_72	GGCAAGGAAATGAGGGGTCAATGTA	48	57	23SrDNA	217																																					0
putrefaciens_117	TAACGTTGAAGTGTGATGGGGAGTGAAC	46	59	23SrDNA	218																5	5							6						5			5			6		0
salivarium_199	CTGCTAACTATAATCTCTGTGAAACC	38	55	23SrDNA	219																																		6					0
synoviae_128	TACGATATAAAGTGCTTGCACGAAACTG	39	59	23SrDNA	221																																								0
synoviae_336	GGTGCCTATTTTAATAGGCCACAGTA	42	56	23SrDNA	220																		4																						0	6
verecundum_124	GAGTCATAATGTATAGCTACTTGTAGTGA	34	56	23SrDNA	222																																									0
U.parvum_110	TTACTATTAAGACCAAGTTATGAATACGAGCGA	33	60	23SrDNA	223																																											0	2
U.urealyticum_117	TAAGACTAAGTTATGAGTACGAGCGACC	43	59	23SrDNA	224							5																					6														1	2	0
